# Supplementary material
Source: HighWire-hosted journal article supplement (https://qualitysafety.bmj.com/content/bmjqs-2021-014438)
Supplement: inline-supplementary-material-1 [file inline-supplementary-material-1.pdf]

Supplemental Table 1. Look-alike, sound-alike (LASA) drug pairs/trios used in the study (10 TML-coded and 10 non-TML-coded pairs or trios). TML; tall man lettering. Created by the authors and approved by all authors.

| <b>LASA pair/trio</b> | <b>TML-coded pairs/trios</b>            | <b>non-TML-coded pairs/trios</b>        |
|-----------------------|-----------------------------------------|-----------------------------------------|
| 1                     | diazePAM, diITIAZem, LORazepam          | diazepam, diltiazem, lorazepam          |
| 2                     | CISatracurium, MIVAcurium, ATRAcurium   | cisatracurium, mivacurium, atracurium   |
| 3                     | ROPIvacain, MEPIvacain, BUPIvacain      | ropivacain, mepivacain, bupivacain      |
| 4                     | DESMOpressin, VASOpressin, TERLIpressin | desmopressin, vasopressin, terlipressin |
| 5                     | ePHEDrin, EPINEPHrin                    | ephedrin, epinephrin                    |
| 6                     | pHYSostigmin, pYRIDostigmin             | physostigmin, pyridostigmin             |
| 7                     | cloZAPin, clonazePAM                    | clozapin, clonazepam                    |
| 8                     | fentaNYL, SUFentanil                    | fentanyl, sufentanil                    |
| 9                     | NIFEdipin, niCARDipin, niMODipin        | nifedipin, nicardipin, nimodipin        |
| 10                    | ROCuronium, VECuronium                  | rocuronium, vecuronium                  |
