# Supplementary material
Source: HighWire-hosted journal article supplement (https://qualitysafety.bmj.com/content/bmjqs-2021-014438)
Supplement: inline-supplementary-material-4 [file inline-supplementary-material-4.pdf]

|                         |                |            |                     |                  |       |                                                                                     |
|-------------------------|----------------|------------|---------------------|------------------|-------|-------------------------------------------------------------------------------------|
| <b>Syringe Set (S9)</b> | Wilson Michael | 01.10.1963 | <b>nalOXON</b>      | <b>40 mcg/ml</b> | PFFMM |    |
|                         | Wilson Michael | 01.10.1963 | <b>NIFEdipin</b>    | <b>0.1 mg/ml</b> | PFFMM |    |
|                         | Wilson Michael | 01.10.1963 | <b>pHYSostigmin</b> | <b>0.4 mg/ml</b> | PFFMM |    |
|                         | Wilson Michael | 01.10.1963 | <b>aMANtadin</b>    | <b>1 mg/ml</b>   | PFFMM |    |
|                         | Wilson Michael | 01.10.1963 | <b>cloZAPin</b>     | <b>2.5 mg/ml</b> | PFFMM |  |
|                         | Wilson Michael | 01.10.1963 | <b>miDAZolam</b>    | <b>1 mg/ml</b>   | PFFMM |  |
|                         | Wilson Michael | 01.10.1963 | <b>niMODipin</b>    | <b>0.1 mg/ml</b> | PFFMM |  |
|                         | Wilson Michael | 01.10.1963 | <b>ADREnalin</b>    | <b>0.1 mg/ml</b> | PFFMM |  |
|                         | Wilson Michael | 01.10.1963 | <b>niCARDipin</b>   | <b>10 mg/ml</b>  | PFFMM |  |
|                         | Wilson Michael | 01.10.1963 | <b>TERLIpressin</b> | <b>0.2 mg/ml</b> | PFFMM |  |

15 participants

Syringe Sets (order randomised)  
S1 | s2 | S3 | s4 | S5 | s6 | S7 | s8 | S9 | s10

Data Analysis: TML vs. non-TML

15 participants

Syringe Sets (order randomised)  
s1 | S2 | s3 | S4 | s5 | S6 | s7 | S8 | s9 | S10

|                         |                |            |                     |                  |       |                                                                                       |
|-------------------------|----------------|------------|---------------------|------------------|-------|---------------------------------------------------------------------------------------|
| <b>Syringe Set (s9)</b> | Wilson Michael | 01.10.1963 | <b>naloxon</b>      | <b>40 mcg/ml</b> | PFFMM |    |
|                         | Wilson Michael | 01.10.1963 | <b>nifedipin</b>    | <b>0.1 mg/ml</b> | PFFMM |    |
|                         | Wilson Michael | 01.10.1963 | <b>physostigmin</b> | <b>0.4 mg/ml</b> | PFFMM |    |
|                         | Wilson Michael | 01.10.1963 | <b>amantadin</b>    | <b>1 mg/ml</b>   | PFFMM |    |
|                         | Wilson Michael | 01.10.1963 | <b>clozapin</b>     | <b>2.5 mg/ml</b> | PFFMM |  |
|                         | Wilson Michael | 01.10.1963 | <b>midazolam</b>    | <b>1 mg/ml</b>   | PFFMM |  |
|                         | Wilson Michael | 01.10.1963 | <b>nimodipin</b>    | <b>0.1 mg/ml</b> | PFFMM |  |
|                         | Wilson Michael | 01.10.1963 | <b>adrenalin</b>    | <b>0.1 mg/ml</b> | PFFMM |  |
|                         | Wilson Michael | 01.10.1963 | <b>nicardipin</b>   | <b>10 mg/ml</b>  | PFFMM |  |
|                         | Wilson Michael | 01.10.1963 | <b>terlipressin</b> | <b>0.2 mg/ml</b> | PFFMM |  |
