# Supplementary material
Source: HighWire-hosted journal article supplement (https://qualitysafety.bmj.com/content/bmjqs-2021-014438)
Supplement: inline-supplementary-material-5 [file inline-supplementary-material-5.pdf]

Supplemental Table 2. TML; tall man lettering. Created by the authors and approved by all authors.

| Error rate |         |          |                |
|------------|---------|----------|----------------|
|            | p-value | Estimate | Standard error |
| Dwell time | < 0.05  | 0.047    | 0.019          |

  

| TML vs. non-TML-coded syringe labels |         |          |                |
|--------------------------------------|---------|----------|----------------|
|                                      | p-value | Estimate | Standard error |
| Dwell time                           | < 0.01  | 902.951  | 287.148        |
| Fixation count                       | < 0.05  | 1.71034  | 0.67201        |
| Fixation duration                    | < 0.01  | 881.330  | 273.133        |
| Revisits                             | < 0.01  | 2.3281   | 0.7637         |

  

| TML at the start vs. mid-to-end position in drug names |         |          |                |
|--------------------------------------------------------|---------|----------|----------------|
|                                                        | p-value | Estimate | Standard error |
| Dwell time                                             | < 0.001 | 3767.29  | 943.89         |
| Fixation count                                         | < 0.001 | 7.1231   | 1.9459         |
| Fixation duration                                      | < 0.001 | 3716.59  | 919.86         |
| Revisits                                               | < 0.01  | 5.9220   | 1.8759         |
